# Supplementary material
Source: MDPI journal article supplement (https://www.mdpi.com/2039-7283/12/3/45)
Supplement: s1 [file s1]

## **Supplemental Tables**

**Table S1.** Representation of the biochemical values with 1 for normal (green color) and 0 for pathological (yellow color). (See Abbreviations).

[illegible]

**Table S2.** *The Hosmer and Lemeshow test representation, Blood group 0 was compared with the other tested blood groups.*

**Hosmer and Lemeshow Test**

| Step | Chi-square | df | Sig. |
|------|------------|----|------|
| 3    | 8,595      | 4  | ,072 |

**Variables in the Equation**

|                     |                | B       | S.E.      | Wald   | df | Sig. | Exp(B) |
|---------------------|----------------|---------|-----------|--------|----|------|--------|
| Step 3 <sup>a</sup> | GenderF1M0(1)  | ,837    | ,426      | 3,856  | 1  | ,050 | 2,310  |
|                     | Blood group 0  |         |           | 7,728  | 3  | ,052 |        |
|                     | Blood group A  | ,898    | ,436      | 4,239  | 1  | ,040 | 2,454  |
|                     | Blood group B  | -,408   | ,551      | ,549   | 1  | ,459 | ,665   |
|                     | Blood group AB | -19,969 | 18491,146 | ,000   | 1  | ,999 | ,000   |
|                     | BMI            | -,210   | ,059      | 12,698 | 1  | ,000 | ,811   |
|                     | Constant       | 3,953   | 1,425     | 7,695  | 1  | ,006 | 52,082 |

a. Variable(s) entered on step 3: GenderF1M0.
